# Supplementary material for: Tailored Meal-Type Food Provision for Diabetes Patients Can Improve Routine Blood Glucose Management in Patients with Type 2 Diabetes: A Crossover Study
Source: MDPI journal article supplement (doi:10.3390/nu16081190), 2024-04-17
Supplement: s1 [file s1]

**Table S1:** Information of meal-type food with diabetes patients

| No | Meal name                                                                     | Weight<br>(g) | Energy<br>(kcal) | Carbohydrate<br>(g) | Protein<br>(g) | Fat<br>(g) | Saturated Fat<br>(g) | Trans Fat<br>(g) | Sugar<br>(g) | Sodium<br>(mg) | Cholesterol<br>(mg) |
|----|-------------------------------------------------------------------------------|---------------|------------------|---------------------|----------------|------------|----------------------|------------------|--------------|----------------|---------------------|
| 1  | Stir-fried spicy pork & rice made of oat and konjac                           | 412           | 635              | 73                  | 36             | 22         | 4.5                  | 0                | 9            | 910            | 75                  |
| 2  | Dak-galbi (spicy stir-fried chicken) & rice made of black rice and konjac     | 396           | 630              | 84                  | 29             | 20         | 3.1                  | 0                | 10           | 910            | 110                 |
| 3  | Tteokgalbi(Korean meat patties) & rice made of brown rice and konjac          | 387           | 630              | 86                  | 22             | 22         | 6                    | 0                | 11           | 1140           | 55                  |
| 4  | Jjajangmyeon (black bean noodles) made with tofu noodles                      | 445           | 625              | 53                  | 38             | 29         | 5.5                  | 0                | 11           | 1230           | 30                  |
| 5  | Grilled chicken breast & rice made of barley and konjac                       | 391           | 605              | 78                  | 31             | 19         | 5.1                  | 0                | 9            | 560            | 105                 |
| 6  | Pork bulgogi & rice made of black rice and konjac                             | 400           | 535              | 67                  | 28             | 17         | 4.6                  | 0                | 8            | 840            | 75                  |
| 7  | Soybean paste sauce & barley rice                                             | 442           | 525              | 69                  | 28             | 15         | 4.2                  | 0                | 8            | 1040           | 40                  |
| 8  | Spicy chicken & rice made of brown rice and konjac                            | 346           | 525              | 78                  | 29             | 11         | 2.3                  | 0                | 6            | 990            | 95                  |
| 9  | Tteokbokki& grilled chicken breast                                            | 352           | 515              | 72                  | 28             | 13         | 3.3                  | 0                | 9            | 830            | 100                 |
| 10 | Jjimdak(Korean braised chicken with vegetables) & rice made of oat and konjac | 404           | 510              | 70                  | 35             | 10         | 3.1                  | 0                | 8            | 850            | 95                  |
